# Supplementary material
Source: Springer Nature journal article supplement (https://www.springermedizin.de/resource/supplementary/13643_2012_49_MOESM4_ESM.pdf/9681376)

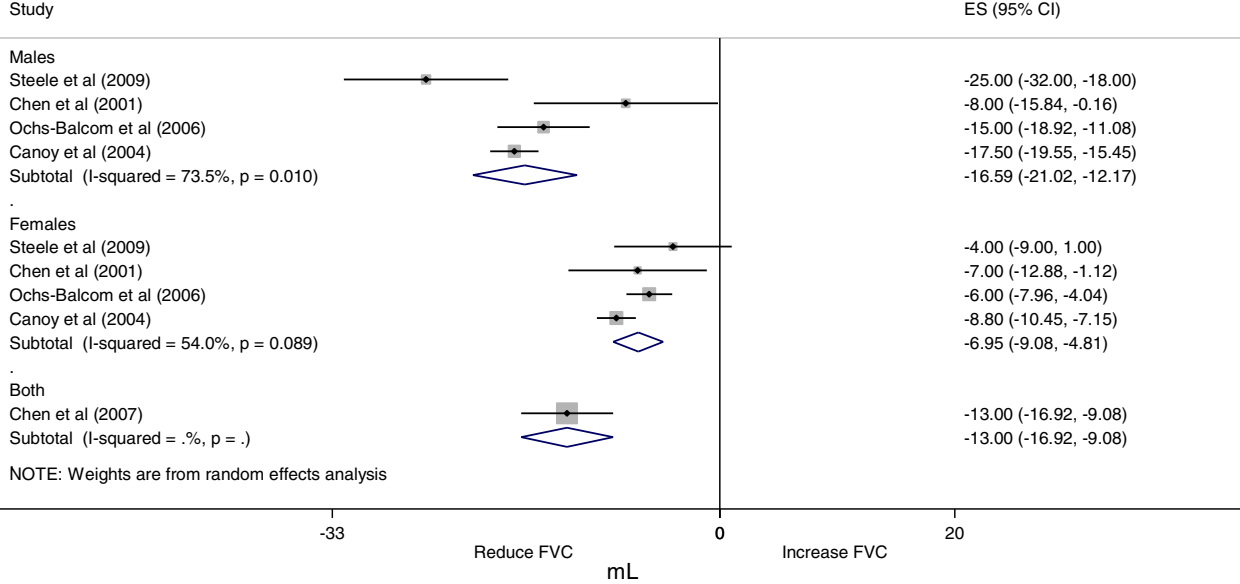

Supplement: MOESM4 [file 9681376]
